# Supplementary material for: Validation of a New Animal Model of Vulnerable Plaques by Intravascular Optical Coherence TomographyIn Vivo
Source: Hindawi journal article supplement (doi:10.1155/2012/469726), 2012-01-01
Supplement: f1 [file 469726.f1.pdf]

**SUPPLEMENTARY TABLE:** Comparison of plasma lipid levels between the rabbits in group A and group B

|                   | Group A<br>(baseline) | Group A<br>(14 weeks) | Group B<br>(baseline) | Group B<br>(14 weeks) | P*    | P**   | P#    |
|-------------------|-----------------------|-----------------------|-----------------------|-----------------------|-------|-------|-------|
| TC<br>(mmol/L)    | 2.3783±1.84<br>493    | 38.0150±2.<br>21306   | 2.5433±<br>1.27169    | 37.7033±1.<br>81081   | 0.860 | 0.795 | 0.760 |
| TG<br>(mmol/L)    | 1.2983±<br>0.33247    | 15.9133±3.<br>79466   | 1.0417±<br>0.38933    | 17.5117±<br>5.27153   | 0.248 | 0.560 | 0.492 |
| HDL-C<br>(mmol/L) | 0.8500±0.32<br>398    | 11.2150±3.<br>76904   | 0.8983±0.3<br>5835    | 9.8433±<br>2.22493    | 0.811 | 0.460 | 0.442 |
| LDL-C<br>(mmol/L) | 0.5383±0.58<br>557    | 29.7183±<br>6.04363   | 0.7717±0.2<br>4629    | 26.4500±<br>4.23321   | 0.399 | 0.303 | 0.267 |

P\*: Group A *versus* group B (baseline plasma lipid level)

P\*\*: Group A *versus* group B (plasma lipid level at 14 weeks)

P#: Group A<sub>14 weeks – baseline</sub> *versus*. Group B<sub>14 weeks – baseline</sub> (increasing plasma lipid level from baseline to 14 weeks)

TC, total cholesterol; TG, total glycerides; HDL-C, high-density lipoprotein-cholesterol; LDL-C, low-density lipoprotein-cholesterol
